# Supplementary material for: Plant membrane assays with cytokinin receptors underpin the unique role of free cytokinin bases as biologically active ligands
Source: PubMed Central journal article supplement (PMC4378623; doi:10.1093/jxb/eru522), 2015-01-21
Supplement: supp_eru522_jexbot140699_file001.pdf [file supp_eru522_jexbot140699_file001.pdf]

## Supplementary data

**Table S1.** Control for pH values inside plant membrane vesicles using pyranine.

The fluorescent dye pyranine (8-hydroxypyrene-1,3,6-trisulfonic acid) (Clement and Gould, 1981) was used as water-soluble membrane-nonpenetrating pH indicator. Pyranine was added to the homogenization buffer during the isolation of microsomal fractions from tobacco leaves, the final concentration was 200  $\mu\text{M}$ . The vesicular suspension was filtered through a Sephadex G-50M column (Pharmacia Fine Chemicals, Uppsala, Sweden), mixed with pH-adjusted buffers and incubated for 10 min. The ratio of fluorescence at  $\lambda_{\text{em}}=510$  nm inside microsomes illuminated with excitation light  $\lambda_{\text{ex}}=405$  nm or  $\lambda_{\text{ex}}=460$  nm was determined. Alamethicin (10  $\mu\text{M}$ ) was added as pore-forming dye in the incubation buffer in order to compare internal and external pH values.

| pH  | Ratio of pyranine fluorescence ( $\lambda=510$ nm) after excitation at $\lambda=405$ and 460 nm |                  |
|-----|-------------------------------------------------------------------------------------------------|------------------|
|     | Without alamethicin                                                                             | With alamethicin |
| 6.5 | $0.42 \pm 0.07$                                                                                 | $0.38 \pm 0.13$  |
| 7.0 | $0.81 \pm 0.11$                                                                                 | $0.86 \pm 0.05$  |
| 7.5 | $1.27 \pm 0.09$                                                                                 | $1.13 \pm 0.07$  |
| 8.0 | $1.93 \pm 0.08$                                                                                 | $1.87 \pm 0.03$  |

**Table S2.** Docking scores (Chemgauss4 function) for the best-scored poses of cytokinin bases and cytokinin ribosides in cytokinin receptors. For the same receptor, lower values correspond to tighter binding.

| Ligand | Cytokinin receptors |        |       |        |
|--------|---------------------|--------|-------|--------|
|        | ZmHK1               | AHK2   | AHK3  | AHK4   |
| tZ     | -13.24              | -10.38 | -7.91 | -14.30 |
| iP     | -12.18              | -9.96  | -8.48 | -13.51 |
| tZR    | -5.64               | -5.02  | -3.91 | -5.53  |
| iPR    | -5.05               | -5.48  | -4.55 | -6.84  |

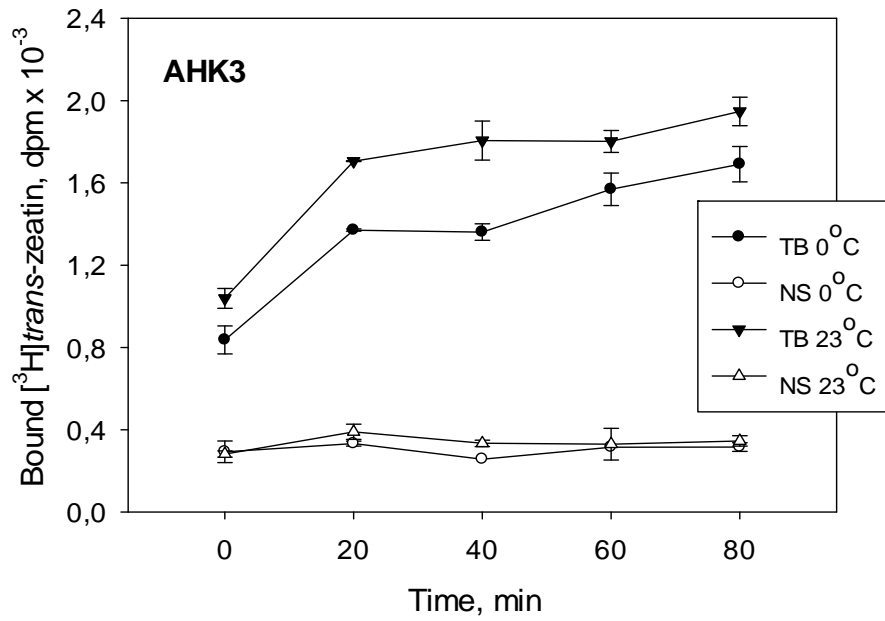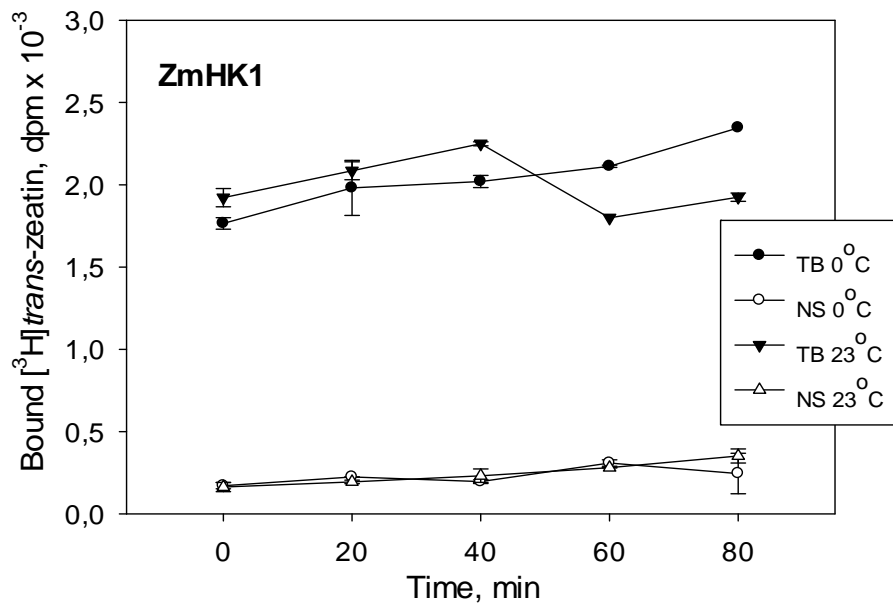

**Fig. S1.** Temperature dependence and rate of [<sup>3</sup>H]tZ binding to cytokinin receptors in the plant assay system. TB, NS and SB mean total, nonspecific and specific binding, respectively.

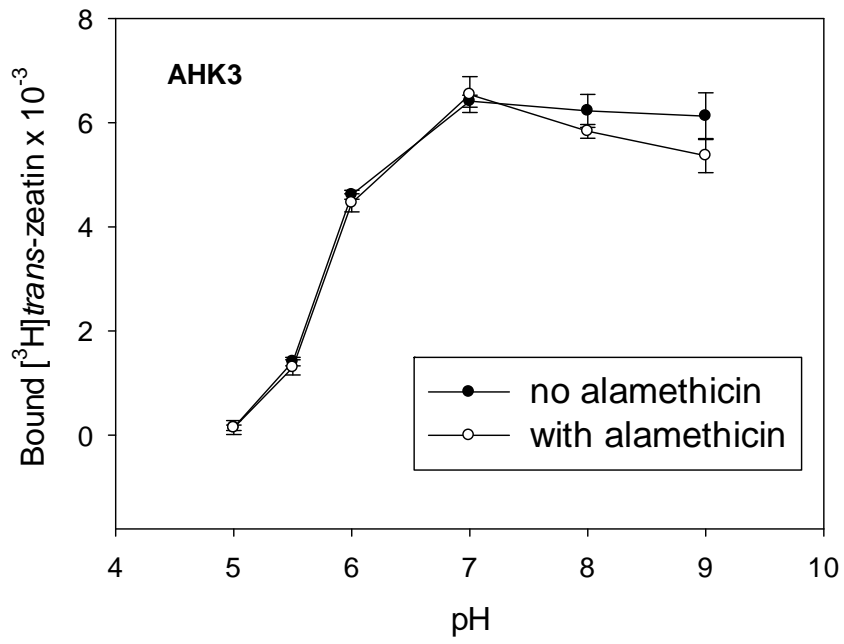

**Fig. S2.** pH dependence of [<sup>3</sup>H]tZ binding to cytokinin receptor AHK3 in the plant assay system. The assay was performed in the absence or presence of the pore forming dye alamethicin (10 μM).

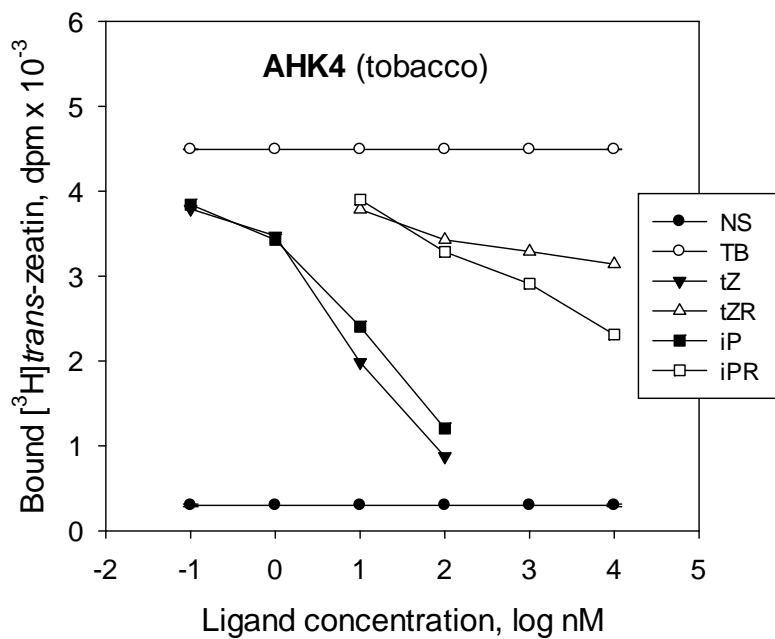

**Fig. S3.** Interaction of cytokinin bases and ribosides with the AHK4 receptor in the plant assay system. Abbreviations: tZ, *trans*-zeatin; tZR, *trans*-zeatin riboside; iP, isopentenyladenine; iPR, isopentenyladenosine; NS and TB mean nonspecific and total binding, respectively. The apparent  $K_D$  for tZ and iP interaction with AHK4 (pH 7.4 and 0-4 °C) were calculated to be 4.6 and 7.6 nM, respectively.

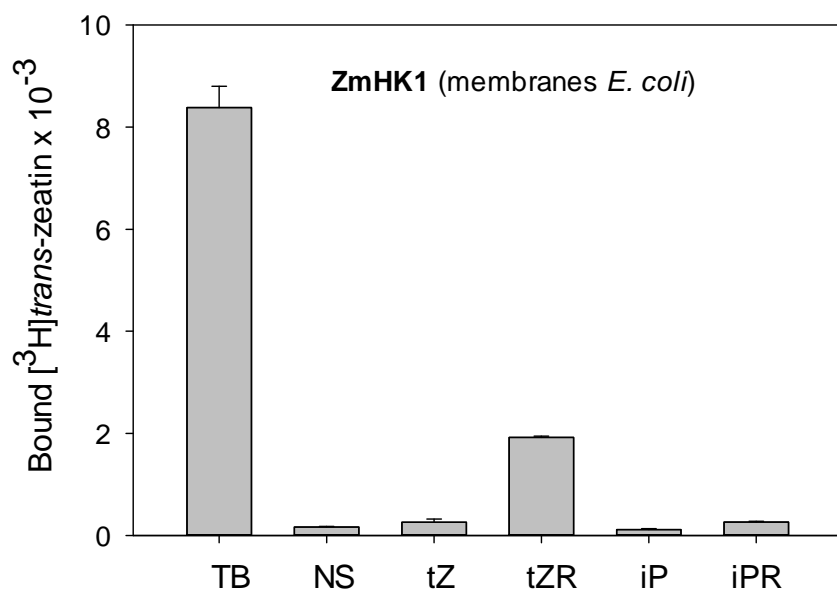

**Fig. S4.** [<sup>3</sup>H]tZ binding to isolated membranes of *E. coli* expressing *ZmHK1*. TB and NS are total and non-specific binding, respectively. The other columns show bound [<sup>3</sup>H]tZ in the presence of 1 μM unlabeled cytokinin bases or the corresponding ribosides as indicated. All tested ligands, *trans*-zeatin (tZ), *trans*-zeatin riboside (tZR), isopentenyladenine (iP) and isopentenyladenosine (iPR) strongly competed with [<sup>3</sup>H]tZ binding to ZmHK1.

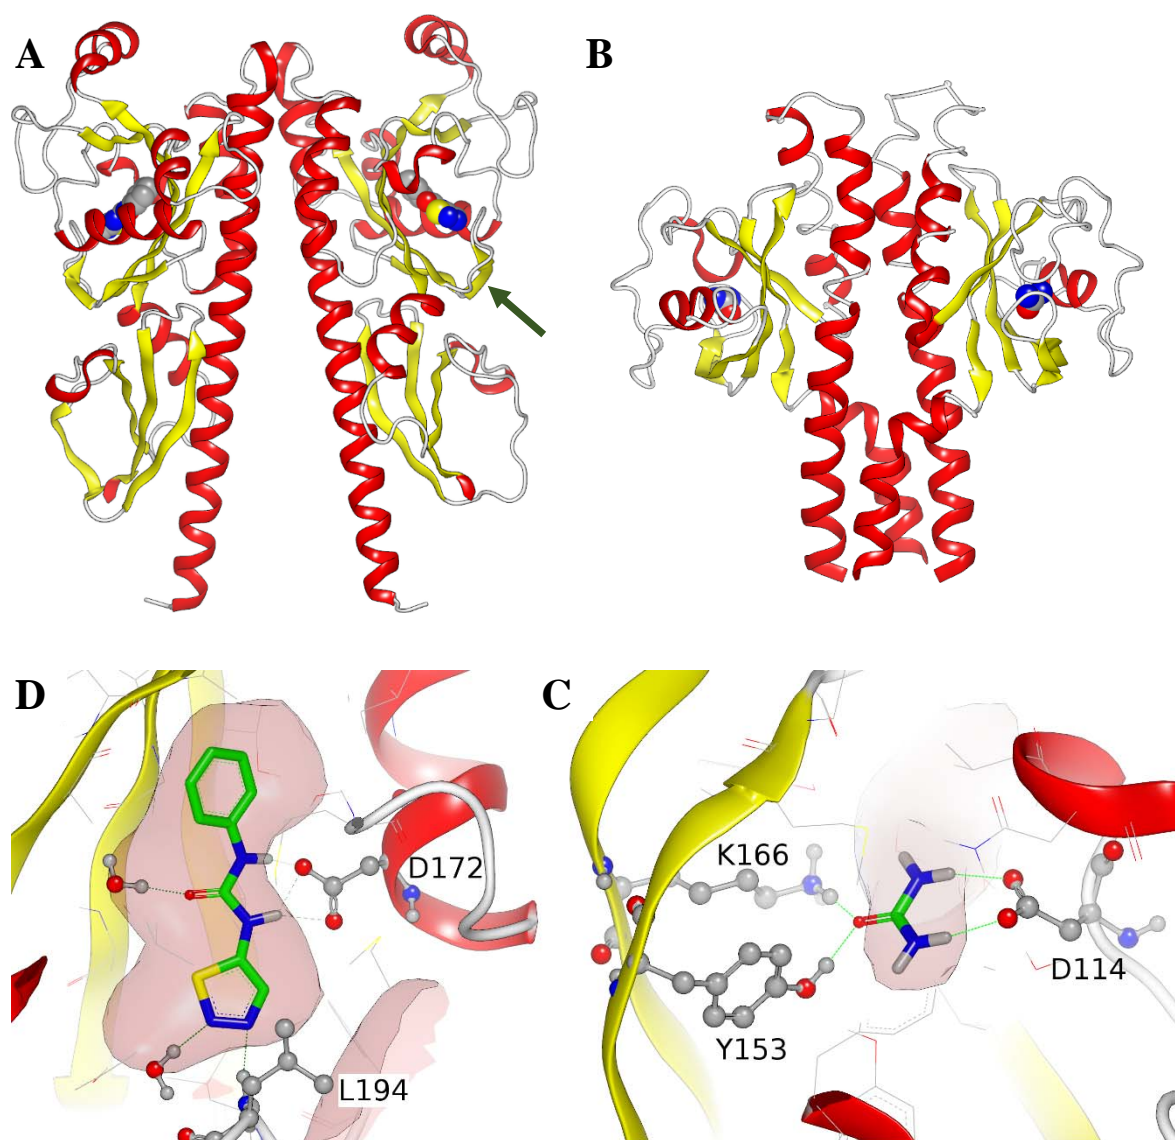

**Fig. S5.** Structure similarity of sensor modules of cytokinin receptor (ZmHK1) and bacterial pH-sensor (TlpB). (A, B) Overall structures of the ZmHK1 dimer complex with thidiazuron (A), and of the TlpB dimer complex with urea (PDB ID 3UB6) (B). In both cases dimerization interfaces are formed with long  $\alpha$ -helices (in red) holding at their 3'ends ligand-binding PAS domains. Ligands are shown in space-filling representation. Arrow points to  $\beta$ 6- $\beta$ 7 loop of ZmHK1. (C, D) Models for the interaction of urea with TlpB (PDB ID 3UB6, hydrogen atoms added in SybylX2.1) (C) and of thidiazuron with ZmHK1 (D). Hydrogen bonds are shown as green dashed lines. Binding cavity surfaces are colored red. The figure has been made using VIDA 4.2.1.
